# Supplementary material for: Carbodiimides as catalysts for the reduction of a cadmium hydride complex
Source: Royal Society of Chemistry journal article supplement (doi:10.1039/c7cc08393a), 2017-12-04
Supplement: c7cc08393a1.pdf [file c7cc08393a1.pdf]

## Carbodiimides as Catalysts for the Reduction of a Cadmium Hydride Complex

D. J. Webb,<sup>a</sup> C. M. Fitchett,<sup>b</sup> M Lein<sup>a</sup> and J. R. Fulton<sup>a</sup>

|                                                                                                                                                        |   |
|--------------------------------------------------------------------------------------------------------------------------------------------------------|---|
| Experimental Details                                                                                                                                   | 1 |
| Table S1. Data Collection Parameters for <b>1</b> and <b>2</b>                                                                                         | 3 |
| Figure S1. ORTEP diagram of <b>1</b>                                                                                                                   | 4 |
| Figure S2. ORTEP diagram of <b>2</b>                                                                                                                   | 4 |
| Computational Details                                                                                                                                  | 5 |
| Table S2: Wiberg Bond Indices                                                                                                                          | 5 |
| Table S3: Reaction energies                                                                                                                            | 5 |
| Figure S3. Canonical Molecular Orbital (MO) and Natural Bonding Orbital (NBO) Plots for <b>1</b> and [(BDI)ZnH]                                        | 6 |
| Figure S4. Canonical Molecular Orbital (MO) and Natural Bonding Orbital (NBO) Plots for <b>2</b> and [(BDI)Zn] <sub>2</sub> ( <i>D</i> <sub>2d</sub> ) | 6 |
| References for Computation Details                                                                                                                     | 7 |
| Cartesians Coordinates                                                                                                                                 | 8 |

**General.** All manipulations were carried out under dry nitrogen using standard Schlenk-line and cannula techniques, or in an inert atmosphere glovebox. Solvents were dried using a PureSolv system (Innovative Technologies) and stored over 4 Å sieves. All other reagents were either distilled prior to use and stored over 4 Å sieves or used as received. Celite 545 (ROTH) was used as the “celite” filtering agent. The <sup>1</sup>H and <sup>13</sup>C spectra were recorded in either C<sub>6</sub>D<sub>6</sub> at 298 K, using a Varian INOVA system at 300 MHz (<sup>1</sup>H) or 75 MHz (<sup>13</sup>C). Proton and carbon chemical shifts were referenced internally to residual solvent resonances. The <sup>113</sup>Cd spectra was obtained on a 400MHz JNM-ECZ400S NMR using a Royal probe. Repeated combustion analysis on compounds **1** and **2** were unsuccessful.

**[CH{(CH<sub>3</sub>)CN-2,6-*i*Pr<sub>2</sub>C<sub>6</sub>H<sub>3</sub>}<sub>2</sub>CdH], [(BDI)CdH] (1).** 238  $\mu$ L of LiHBEt<sub>3</sub> in THF (0.0252 g, 0.238 mmol) was added drop-wise to a slurry of [(BDI)CdCl] (0.150 g, 0.265 mmol) in 4 mL of toluene at -30 °C. The mixture was allowed to stir for 1 minute where it was filtered through celite to remove black precipitate and the volatiles were removed in *vacuo*. Solid was re-dissolved and crystalized from hexane or diethyl ether to give [(BDI)CdH] as small colourless cubic crystals (0.0944 g, 74.6%). The product was stable at room temperature but decomposed above 126 °C. <sup>1</sup>H NMR (299.74 MHz, C<sub>6</sub>D<sub>6</sub>, 298 K):  $\delta$  7.11 (s, 6H, ArH), 5.63 (br, 1H, CdH), 4.91 (s, 1H,  $\gamma$ -CH), 3.29 (septet, J = 6.7 Hz, 4H, CHMe<sub>2</sub>), 1.70 (s, 6H, NCMe), 1.23 (d, J = 6.8 Hz, 12H, CHMe<sub>2</sub>), 1.16 (d, J = 6.7 Hz, 12H, CHMe<sub>2</sub>). <sup>13</sup>C{<sup>1</sup>H} NMR (150.76 MHz, C<sub>6</sub>D<sub>6</sub>, 298 K):  $\delta$  168.14 (NCMe), 146.42 (*ipso*-C), 141.10 (*o*-C), 125.76 (*p*-C), 124.00 (*m*-C), 94.71 ( $\gamma$ -C), 28.21 (CHMe<sub>2</sub>), 24.79 (CHMe<sub>2</sub>), 24.10 (CHMe<sub>2</sub>), 23.30 (NCMe). <sup>113</sup>Cd{<sup>1</sup>H} NMR (C<sub>6</sub>D<sub>6</sub>):  $\delta$  650 (unable to observe Cd-H coupling). IR (Nujol):  $\nu$ (Cd-H) 1734 cm<sup>-1</sup>.

**[CH{(CH<sub>3</sub>)CN-2,6-*i*Pr<sub>2</sub>C<sub>6</sub>H<sub>3</sub>}<sub>2</sub>Cd]<sub>2</sub>, [(BDI)Cd]<sub>2</sub> (2).** A hexane solution (5 mL) of dicyclohexylcarbodiimide (0.019 g, 0.094 mmol) in hexane (5 mL) was added to a hexane solution (5 mL) of **1** (0.050 g, 0.094 mmol). The colourless reaction was stirred for 16 hours. Volatiles were removed *in vacuo* from the colourless and transparent solution. The resulting residue was re-dissolved into hexane (2 mL) and kept at -30 °C. Colourless cubic crystals suitable for X-ray diffraction were grown within 24 hours (0.078 g, 78%). <sup>1</sup>H NMR (299.74 MHz, C<sub>6</sub>D<sub>6</sub>, 298 K):  $\delta$  7.04 (s, 6H, ArH), 4.78 (s, 1H,  $\gamma$ -CH), 3.12 (septet, J = 6.9 Hz, 4H, CHMe<sub>2</sub>), 1.57 (s, 6H, NCMe), 1.16 (d, J = 6.7 Hz, 12H, CHMe<sub>2</sub>), 0.92 (d, J = 7.0 Hz, 12H, CHMe<sub>2</sub>). <sup>13</sup>C{<sup>1</sup>H} NMR (150.76 MHz, C<sub>6</sub>D<sub>6</sub>, 298 K):  $\delta$  166.74 (NCMe), 147.79 (*ipso*-C), 141.06 (*o*-C), 125.02 (*p*-C), 123.88 (*m*-C), 95.04 ( $\gamma$ -C), 28.24 (CHMe<sub>2</sub>), 24.94 (CHMe<sub>2</sub>), 24.63 (CHMe<sub>2</sub>), 23.06 (NCMe). A <sup>113</sup>Cd NMR signal was not observed.

**Crystal-Structure Data.** Crystals were mounted on an Agilent SuperNova diffractometer fitted with an Atlas detector. Data was collected at 120.01(10) K using Mo-K $\alpha$  radiation at 0.71073 Å. The structures were refined with SHELXL-97.

**Table S1.** Data Collection Parameters for **1** and **2**

|                                           | [(BDI)CdH] ( <b>1</b> )                                        | [(BDI)Cd] <sub>2</sub>                                         |
|-------------------------------------------|----------------------------------------------------------------|----------------------------------------------------------------|
| Empirical formula                         | C <sub>29</sub> H <sub>42</sub> CdN <sub>2</sub>               | C <sub>58</sub> H <sub>82</sub> Cd <sub>2</sub> N <sub>4</sub> |
| Formula weight                            | 531.04                                                         | 1060.07                                                        |
| Crystal system                            | monoclinic                                                     | monoclinic                                                     |
| Space group                               | P2 <sub>1</sub> /n                                             | P2 <sub>1</sub> /c                                             |
| a/Å                                       | 12.5364(4)                                                     | 14.4118(4)                                                     |
| b/Å                                       | 15.9813(3)                                                     | 14.2417(4)                                                     |
| c/Å                                       | 14.0907(4)                                                     | 26.8111(8)                                                     |
| α/°                                       | 90                                                             | 90                                                             |
| β/°                                       | 105.609(3)                                                     | 94.817(3)                                                      |
| γ/°                                       | 90                                                             | 90                                                             |
| Volume/Å <sup>3</sup>                     | 2718.94(12)                                                    | 5483.5(3)                                                      |
| Z                                         | 4                                                              | 4                                                              |
| ρ <sub>calc</sub> /g/cm <sup>3</sup>      | 1.297                                                          | 1.284                                                          |
| μ/mm <sup>-1</sup>                        | 0.821                                                          | 0.814                                                          |
| F(000)                                    | 1112.0                                                         | 2216.0                                                         |
| Crystal size/mm <sup>3</sup>              | 0.23 × 0.2 × 0.04                                              | 0.23 × 0.2 × 0.04                                              |
| 2θ range for data collection/°            | 5.688 to 70.548                                                | 5.396 to 54.998                                                |
| Reflections collected                     | 35828                                                          | 60496                                                          |
| Independent reflections                   | 11367 [R <sub>int</sub> = 0.0347, R <sub>sigma</sub> = 0.0389] | 12588 [R <sub>int</sub> = 0.0470, R <sub>sigma</sub> = 0.0364] |
| Data/restraints/parameters                | 11367/0/303                                                    | 12588/0/597                                                    |
| Goodness-of-fit on F <sup>2</sup>         | 1.079                                                          | 1.117                                                          |
| Final R indexes [I >= 2σ (I)]             | R <sub>1</sub> = 0.0330, wR <sub>2</sub> = 0.0772              | R <sub>1</sub> = 0.0352, wR <sub>2</sub> = 0.0746              |
| Final R indexes [all data]                | R <sub>1</sub> = 0.0489, wR <sub>2</sub> = 0.0874              | R <sub>1</sub> = 0.0471, wR <sub>2</sub> = 0.0812              |
| Largest diff. peak/hole/e Å <sup>-3</sup> | 1.17/-0.81                                                     | 0.89/-0.71                                                     |

**Figure S1.** ORTEP diagram of **1**. Ellipsoids shown at 30%.

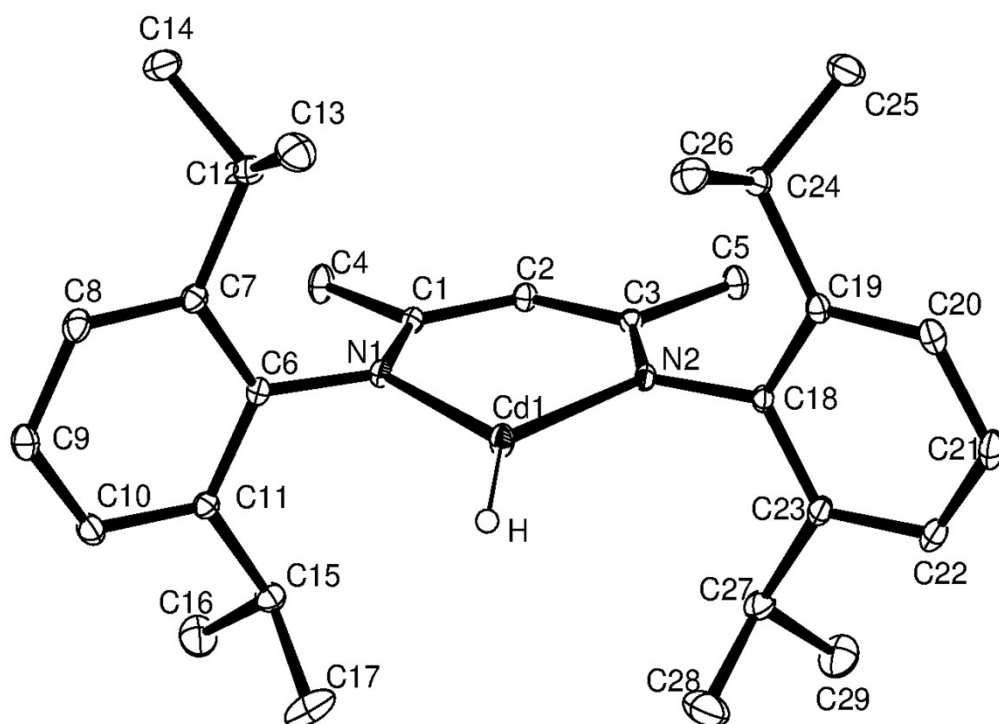

**Figure S2.** ORTEP diagram of **2**. Ellipsoids shown at 30%.

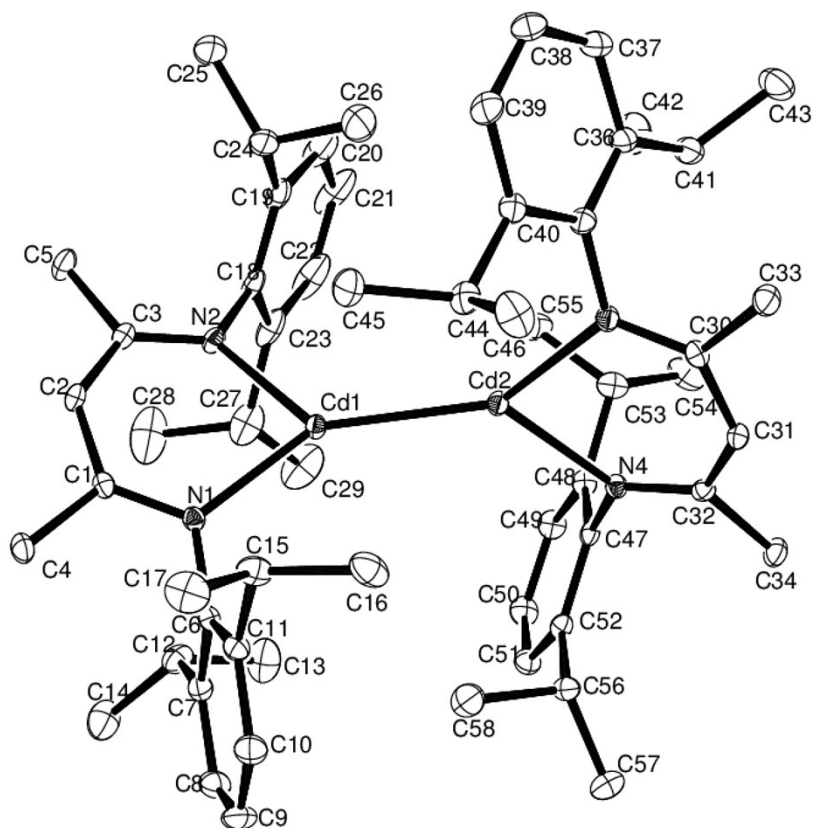

## Computational Methods

All structural optimisations were carried out with the Gaussian 09 suite of programs (Revision D.01)<sup>2</sup> using the density functional method (DFT). with the the PBE0 hybrid functional<sup>3</sup> and the balanced, polarised def2-TZVP basis-set<sup>4</sup> of triple- $\zeta$  quality. Grimme's empirical dispersion correction<sup>5</sup> (D3) with Becke-Johnston damping<sup>6</sup> (BJ) was applied. We refer to the resulting computational model as PBE0-D3(BJ)/def2-TZVP. Frequency calculations at the same level of theory were employed to ensure that the obtained structures are minima on the potential energy surface.

The bonding was analysed using the Natural Bond Orbital (NBO) approach<sup>7-13</sup> using the NBO 6.0 program<sup>14, 15</sup> and Wiberg Bond Indices (WBI) were computed<sup>16</sup>.

Natural Bond Orbitals (NBOs)<sup>7-13</sup> are orbitals that have been localised to one or two (or, in the case of multiple center bonds or strong delocalisation, more) nuclei with the additional condition to maximise the density (i.e. the occupation) of these orbitals. Hence, NBOs are the molecular orbital analogue of finding the Lewis structure, *i.e.* assigning electron pairs to atoms (as either “core electrons” or “lone pairs”) and bonds in optimally compact form.

**Table S2:** Wiberg Bond Indices for the Cd-H and Zn-H bonds as well as for the Cd-Cd and Zn-Zn bonds in the investigated complexes of different symmetry. The lowest energy structures are indicated in bold.

| Bond         | Symmetry              | Bond Length (Å) | WBI           |
|--------------|-----------------------|-----------------|---------------|
| <b>Cd-H</b>  | <b>C<sub>2v</sub></b> | <b>1.675</b>    | <b>0.6570</b> |
| <b>Zn-H</b>  | <b>C<sub>2v</sub></b> | <b>1.551</b>    | <b>0.6108</b> |
| <b>Cd-Cd</b> | <b>D<sub>2</sub></b>  | <b>2.675</b>    | <b>0.6856</b> |
| Cd-Cd        | D <sub>2d</sub>       | 2.681           | 0.7056        |
| Cd-Cd        | D <sub>2h</sub>       | 2.772           | 0.7018        |
| <b>Zn-Zn</b> | <b>D<sub>2d</sub></b> | <b>2.525</b>    | <b>0.7100</b> |
| Zn-Zn        | D <sub>2h</sub>       | 2.666           | 0.7084        |

**Table S3.** Reaction energies for the formation of Cd-Cd and Zn-Zn from Cd-H and Zn-H in a reaction:  $2 \text{ M-H} \rightarrow \text{H}_2 + \text{M-M}$ . All energies in  $\text{kJ mol}^{-1}$

|       | $\Delta E_{0\text{K}}$ | $\Delta H$ |
|-------|------------------------|------------|
| Cd-Cd | -142.33                | -138.27    |
| Zn-Zn | -14.50                 | -18.19     |

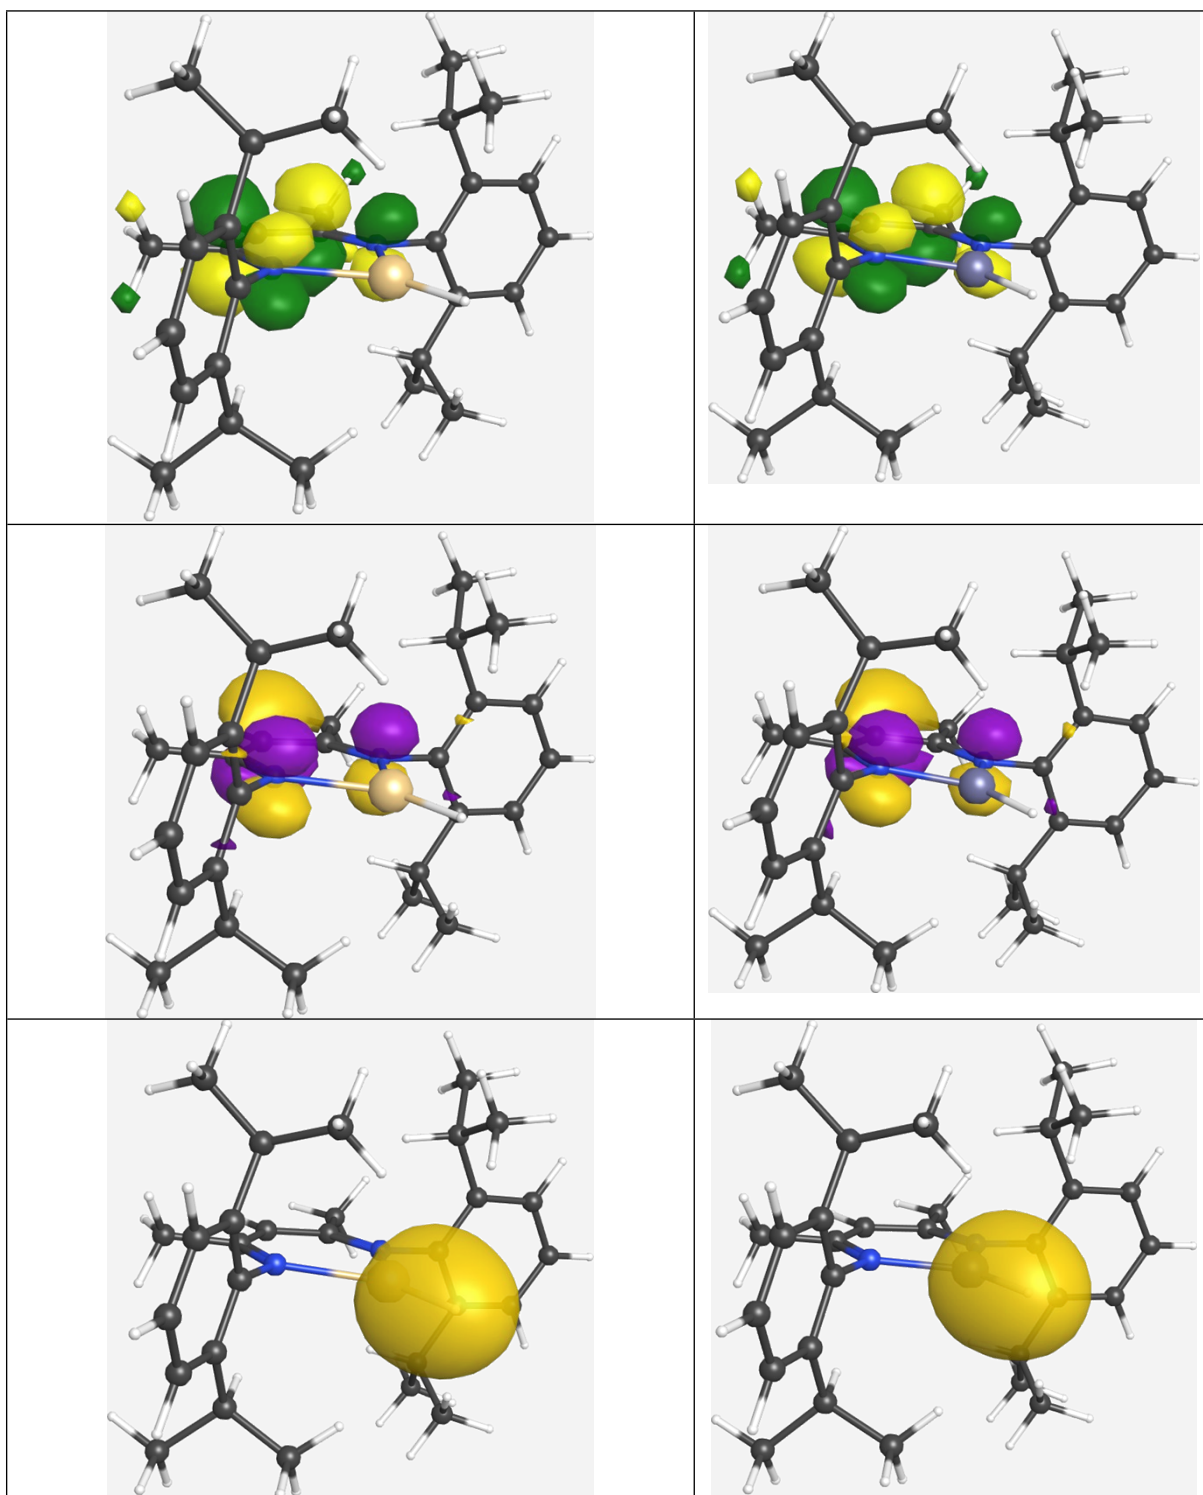

**Figure S3.** Plots of the Canonical LUMO (top), HOMO (middle) and the Natural Bonding Orbital that describes the M-H bond (bottom) for [(BDI)CdH] (**1**, left) and [(BDI)ZnH] (right).

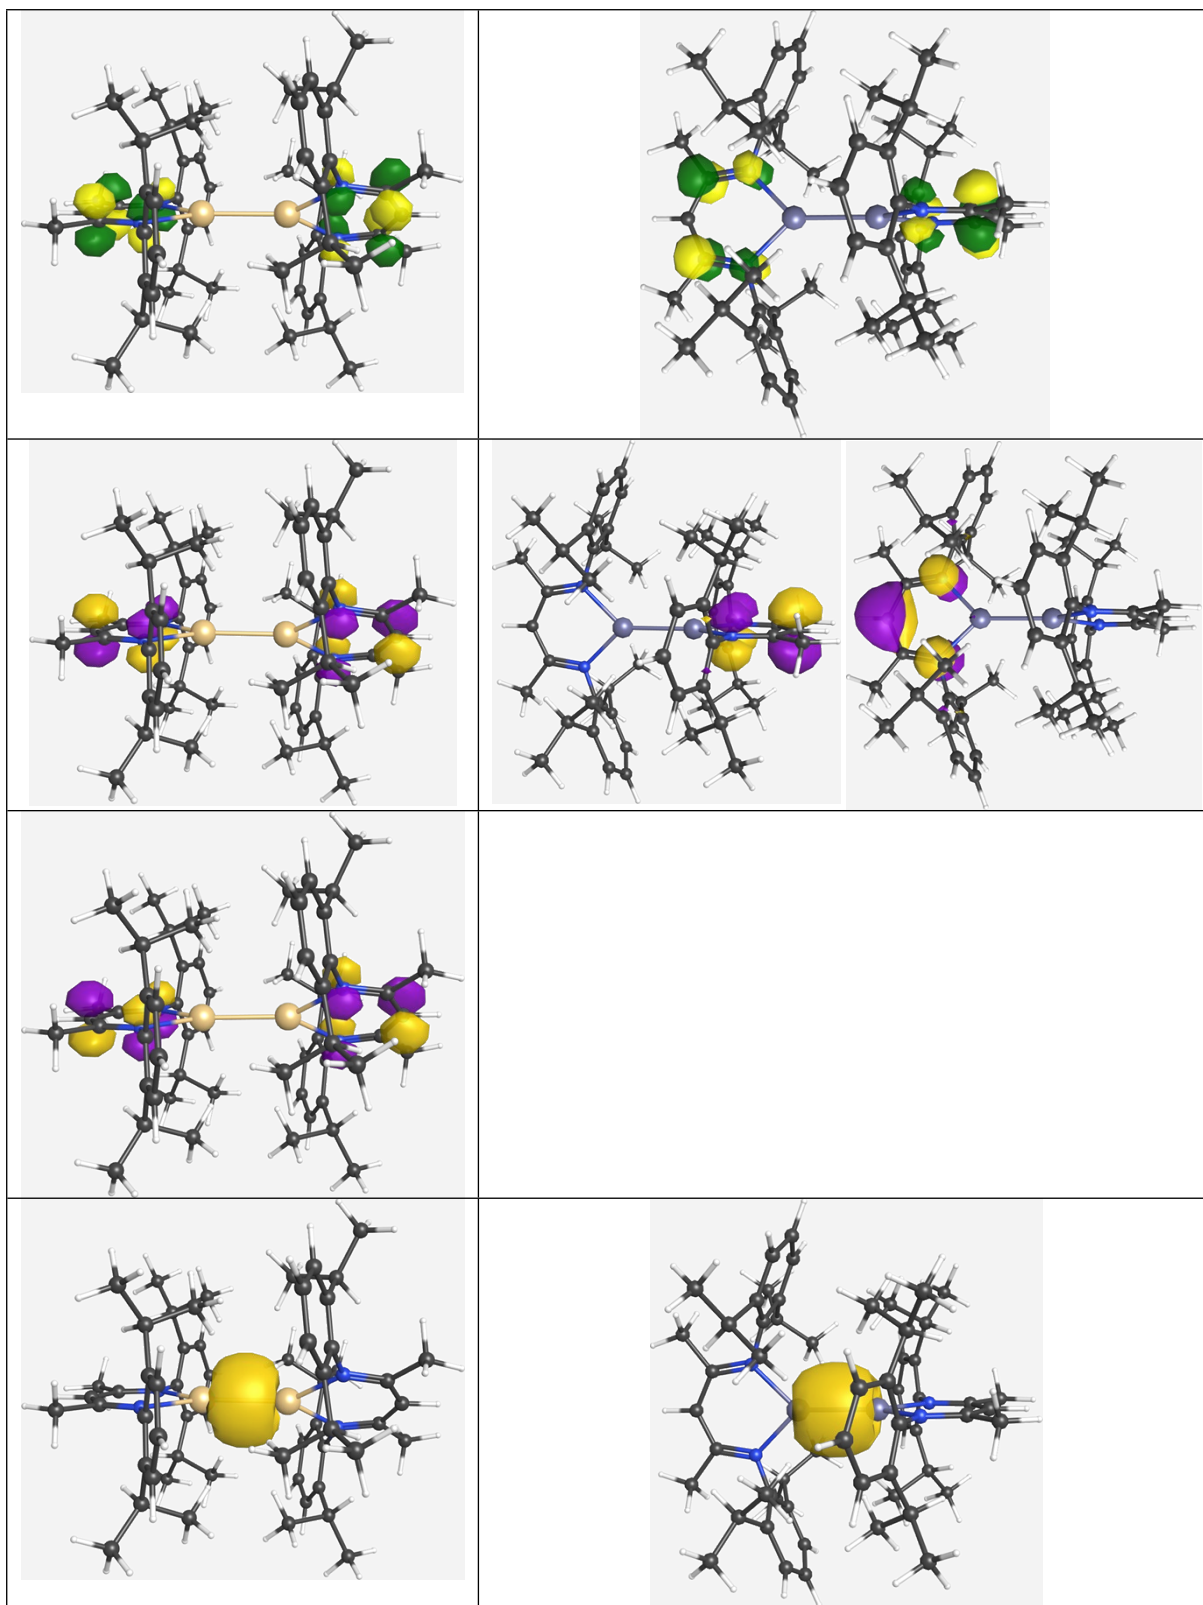

**Figure S2** Plots of the Canonical LUMO (top), HOMO (second from the top, note that the LUMO of  $[(\text{BDI})\text{Zn}]_2$  compound is doubly degenerate), the HOMO-1 of the 2 compound (second from the bottom, left column) and the Natural Bonding Orbital that describes the metal-metal bond (bottom) for  $[(\text{BDI})\text{Cd}]_2$  (**2**, left) and  $[(\text{BDI})\text{Zn}]_2$  (right).

1. G. Bendt, S. Schulz, J. Spielmann, S. Schmidt, D. Bläser and C. Wölper, *Eur. J. Inorg. Chem.*, 2012, **2012**, 3725.
2. M. J. Frisch, G. W. Trucks, H. B. Schlegel, G. E. Scuseria, M. A. Robb, J. R. Cheeseman, G. Scalmani, V. Barone, B. Mennucci, G. A. Petersson, H. Nakatsuji, M. Caricato, X. Li, H. P. Hratchian, A. F. Izmaylov, J. Bloino, G. Zheng, J. L. Sonnenberg, M. Hada, M. Ehara, K. Toyota, R. Fukuda, J. Hasegawa, M. Ishida, T. Nakajima, Y. Honda, O. Kitao, H. Nakai, T. Vreven, J. A. Montgomery Jr., J. E. Peralta, F. Ogliaro, M. Bearpark, J. J. Heyd, E. Brothers, K. N. Kudin, V. N. Staroverov, R. Kobayashi, J. Normand, K. Raghavachari, A. Rendell, J. C. Burant, S. S. Iyengar, J. Tomasi, M. Cossi, N. Rega, J. M. Millam, M. Klene, J. E. Knox, J. B. Cross, V. Bakken, C. Adamo, J. Jaramillo, R. Gomperts, R. E. Stratmann, O. Yazyev, A. J. Austin, R. Cammi, C. Pomelli, J. W. Ochterski, R. L. Martin, K. Morokuma, V. G. Zakrzewski, G. A. Voth, P. Salvador, J. J. Dannenberg, S. Dapprich, A. D. Daniels, Ö. Farkas, J. B. Foresman, J. V. Ortiz, J. Cioslowski and D. J. Fox, 2009.
3. C. Adamo and V. Barone, *J. Chem. Phys.*, 1999, **110**, 6158.
4. F. Weigend and R. Ahlrichs, *Phys. Chem. Chem. Phys.*, 2005, **7**, 3297.
5. S. Grimme, J. Antony, S. Ehrlich and H. Krieg, *J. Chem. Phys.*, 2010, **132**, 154104.
6. S. Grimme, S. Ehrlich and L. Goerigk, *J. Comp. Chem.*, 2011, **32**, 1456.
7. J. P. Foster and F. Weinhold, *J. Am. Chem. Soc.*, 1980, **102**, 7211.
8. A. E. Reed and F. Weinhold, *J. Chem. Phys.*, 1983, **78**, 4066.
9. A. E. Reed, R. B. Weinstock and F. Weinhold, *J. Chem. Phys.*, 1985, **83**, 735.
10. A. E. Reed and F. Weinhold, *J. Chem. Phys.*, 1985, **83**, 1736.
11. J. E. Carpenter and F. Weinhold, *J. Mol. Struct. (Theochem)*, 1988, **46**.
12. A. E. Reed, L. A. Curtiss and F. Weinhold, *Chem. Rev.*, 1988, **88**, 899.
13. F. Weinhold and J. E. Carpenter, eds. R. Naaman and Z. Vager, Plenum, 1988, pp. 227.
14. E. D. Glendening, J. K. Badenhop, A. E. Reed, J. E. Carpenter, J. A. Bohmann, C. M. Morales, C. R. Landis and F. Weinhold, 2013.
15. E. D. Glendening, C. R. Landis and F. Weinhold, *J. Comp. Chem.*, 2013, **34**, 1429.
16. K. B. Wiberg, *Tetrahedron*, 1968, **24**, 1083



## Cartesian Coordinates

### [(BDI)CdH] (1) (C<sub>2v</sub>)

|    |           |           |           |
|----|-----------|-----------|-----------|
| C  | -3.120337 | -2.250978 | 1.216110  |
| H  | -3.356305 | -3.071091 | 1.899640  |
| H  | -4.039047 | -1.688416 | 1.029498  |
| H  | -2.416405 | -1.592816 | 1.732115  |
| C  | -2.536559 | -2.788928 | -0.088846 |
| C  | -1.220525 | -3.487604 | 0.168856  |
| C  | 0.000000  | -2.850449 | -0.102169 |
| N  | 0.000000  | -1.513740 | -0.576087 |
| Cd | 0.000000  | 0.000000  | 1.003255  |
| N  | 0.000000  | 1.513740  | -0.576087 |
| C  | 0.000000  | 1.273050  | -1.873740 |
| C  | 0.000000  | 0.000000  | -2.458928 |
| C  | 0.000000  | -1.273050 | -1.873740 |
| C  | 0.000000  | -2.443650 | -2.818004 |
| H  | 0.874770  | -3.075002 | -2.644807 |
| H  | 0.000000  | -2.114084 | -3.854788 |
| H  | -0.874770 | -3.075002 | -2.644807 |
| H  | 0.000000  | 0.000000  | -3.539549 |
| C  | 0.000000  | 2.443650  | -2.818004 |
| H  | -0.874770 | 3.075002  | -2.644807 |
| H  | 0.000000  | 2.114084  | -3.854788 |
| H  | 0.874770  | 3.075002  | -2.644807 |
| C  | 0.000000  | 2.850449  | -0.102169 |
| C  | -1.220525 | 3.487604  | 0.168856  |
| C  | -1.196424 | 4.763164  | 0.719982  |
| H  | -2.131478 | 5.266328  | 0.939258  |
| C  | 0.000000  | 5.400761  | 0.996793  |
| H  | 0.000000  | 6.395122  | 1.428175  |
| C  | 1.196424  | 4.763164  | 0.719982  |
| H  | 2.131478  | 5.266328  | 0.939258  |
| C  | 1.220525  | 3.487604  | 0.168856  |
| C  | 2.536559  | 2.788928  | -0.088846 |
| H  | 2.331517  | 1.932705  | -0.735582 |
| C  | 3.120337  | 2.250978  | 1.216110  |
| H  | 3.356305  | 3.071091  | 1.899640  |
| H  | 4.039047  | 1.688416  | 1.029498  |
| H  | 2.416405  | 1.592816  | 1.732115  |
| C  | 3.545568  | 3.675996  | -0.808389 |

|   |           |           |           |
|---|-----------|-----------|-----------|
| H | 3.132281  | 4.080029  | -1.735416 |
| H | 4.442583  | 3.103469  | -1.056992 |
| H | 3.859027  | 4.519418  | -0.188318 |
| C | -2.536559 | 2.788928  | -0.088846 |
| H | -2.331517 | 1.932705  | -0.735582 |
| C | -3.545568 | 3.675996  | -0.808389 |
| H | -3.859027 | 4.519418  | -0.188318 |
| H | -4.442583 | 3.103469  | -1.056992 |
| H | -3.132281 | 4.080029  | -1.735416 |
| C | -3.120337 | 2.250978  | 1.216110  |
| H | -2.416405 | 1.592816  | 1.732115  |
| H | -4.039047 | 1.688416  | 1.029498  |
| H | -3.356305 | 3.071091  | 1.899640  |
| H | 0.000000  | 0.000000  | 2.678041  |
| C | 1.220525  | -3.487604 | 0.168856  |
| C | 1.196424  | -4.763164 | 0.719982  |
| C | 0.000000  | -5.400761 | 0.996793  |
| C | -1.196424 | -4.763164 | 0.719982  |
| H | -2.131478 | -5.266328 | 0.939258  |
| H | 0.000000  | -6.395122 | 1.428175  |
| H | 2.131478  | -5.266328 | 0.939258  |
| C | 2.536559  | -2.788928 | -0.088846 |
| H | 2.331517  | -1.932705 | -0.735582 |
| C | 3.545568  | -3.675996 | -0.808389 |
| H | 3.859027  | -4.519418 | -0.188318 |
| H | 4.442583  | -3.103469 | -1.056992 |
| H | 3.132281  | -4.080029 | -1.735416 |
| C | 3.120337  | -2.250978 | 1.216110  |
| H | 2.416405  | -1.592816 | 1.732115  |
| H | 4.039047  | -1.688416 | 1.029498  |
| H | 3.356305  | -3.071091 | 1.899640  |
| H | -2.331517 | -1.932705 | -0.735582 |
| C | -3.545568 | -3.675996 | -0.808389 |
| H | -4.442583 | -3.103469 | -1.056992 |
| H | -3.859027 | -4.519418 | -0.188318 |
| H | -3.132281 | -4.080029 | -1.735416 |

[(BDI)ZnH] (C<sub>2v</sub>)

|    |          |          |           |
|----|----------|----------|-----------|
| Zn | 0.000000 | 0.000000 | 0.793949  |
| N  | 0.000000 | 1.463281 | -0.519070 |

|   |           |           |           |
|---|-----------|-----------|-----------|
| N | 0.000000  | -1.463281 | -0.519070 |
| C | 0.000000  | -1.263418 | -1.826615 |
| C | 0.000000  | 1.263418  | -1.826615 |
| C | 0.000000  | 0.000000  | -2.428632 |
| H | 0.000000  | 0.000000  | -3.509155 |
| C | 3.067201  | 2.089207  | 1.297509  |
| H | 3.293205  | 2.863266  | 2.036024  |
| H | 3.983158  | 1.524182  | 1.104855  |
| H | 2.335464  | 1.413750  | 1.747528  |
| C | 0.000000  | 2.455269  | -2.739317 |
| H | -0.874756 | 3.082142  | -2.550166 |
| H | 0.000000  | 2.150287  | -3.783664 |
| H | 0.874756  | 3.082142  | -2.550166 |
| C | 0.000000  | -2.455269 | -2.739317 |
| H | 0.874756  | -3.082142 | -2.550166 |
| H | 0.000000  | -2.150287 | -3.783664 |
| H | -0.874756 | -3.082142 | -2.550166 |
| C | 0.000000  | 2.788761  | -0.006677 |
| C | 1.221047  | 3.417398  | 0.275240  |
| C | 1.196943  | 4.683885  | 0.847209  |
| H | 2.131305  | 5.183711  | 1.075441  |
| C | 0.000000  | 5.316071  | 1.133577  |
| H | 0.000000  | 6.303403  | 1.580931  |
| C | -1.196943 | 4.683885  | 0.847209  |
| H | -2.131305 | 5.183711  | 1.075441  |
| C | -1.221047 | 3.417398  | 0.275240  |
| C | 2.534654  | 2.717078  | 0.010690  |
| H | 2.338202  | 1.905127  | -0.693643 |
| C | 3.579074  | 3.628057  | -0.622314 |
| H | 4.469091  | 3.052381  | -0.887876 |
| H | 3.896969  | 4.418840  | 0.061499  |
| H | 3.198532  | 4.104038  | -1.529107 |
| C | -2.534654 | 2.717078  | 0.010690  |
| H | -2.338202 | 1.905127  | -0.693643 |
| C | -3.579074 | 3.628057  | -0.622314 |
| H | -3.896969 | 4.418840  | 0.061499  |
| H | -4.469091 | 3.052381  | -0.887876 |
| H | -3.198532 | 4.104038  | -1.529107 |
| C | -3.067201 | 2.089207  | 1.297509  |
| H | -2.335464 | 1.413750  | 1.747528  |
| H | -3.983158 | 1.524182  | 1.104855  |

|   |           |           |           |
|---|-----------|-----------|-----------|
| H | -3.293205 | 2.863266  | 2.036024  |
| C | 0.000000  | -2.788761 | -0.006677 |
| C | 1.221047  | -3.417398 | 0.275240  |
| C | 1.196943  | -4.683885 | 0.847209  |
| H | 2.131305  | -5.183711 | 1.075441  |
| C | 0.000000  | -5.316071 | 1.133577  |
| H | 0.000000  | -6.303403 | 1.580931  |
| C | -1.196943 | -4.683885 | 0.847209  |
| H | -2.131305 | -5.183711 | 1.075441  |
| C | -1.221047 | -3.417398 | 0.275240  |
| C | 2.534654  | -2.717078 | 0.010690  |
| H | 2.338202  | -1.905127 | -0.693643 |
| C | 3.579074  | -3.628057 | -0.622314 |
| H | 3.896969  | -4.418840 | 0.061499  |
| H | 4.469091  | -3.052381 | -0.887876 |
| H | 3.198532  | -4.104038 | -1.529107 |
| C | 3.067201  | -2.089207 | 1.297509  |
| H | 2.335464  | -1.413750 | 1.747528  |
| H | 3.983158  | -1.524182 | 1.104855  |
| H | 3.293205  | -2.863266 | 2.036024  |
| C | -2.534654 | -2.717078 | 0.010690  |
| H | -2.338202 | -1.905127 | -0.693643 |
| C | -3.067201 | -2.089207 | 1.297509  |
| H | -3.293205 | -2.863266 | 2.036024  |
| H | -3.983158 | -1.524182 | 1.104855  |
| H | -2.335464 | -1.413750 | 1.747528  |
| C | -3.579074 | -3.628057 | -0.622314 |
| H | -3.198532 | -4.104038 | -1.529107 |
| H | -4.469091 | -3.052381 | -0.887876 |
| H | -3.896969 | -4.418840 | 0.061499  |
| H | 0.000000  | 0.000000  | 2.345054  |

**[(BDI)Cd]<sub>2</sub> (2) (D<sub>2</sub>)**

|    |           |           |           |
|----|-----------|-----------|-----------|
| Cd | 0.000000  | 0.000000  | -1.337261 |
| N  | 1.435215  | 0.547166  | -2.968789 |
| N  | -1.435215 | -0.547166 | -2.968789 |
| C  | -1.195761 | -0.442067 | -4.263795 |
| C  | 1.195761  | 0.442067  | -4.263795 |
| C  | 0.000000  | 0.000000  | -4.841695 |
| H  | 0.000000  | 0.000000  | -5.922106 |

|   |           |           |           |
|---|-----------|-----------|-----------|
| C | 3.015132  | -2.066241 | -1.276101 |
| H | 3.767665  | -2.010321 | -0.488624 |
| H | 2.789342  | -3.119533 | -1.463577 |
| H | 2.112064  | -1.594134 | -0.881798 |
| C | 2.284380  | 0.823892  | -5.232811 |
| H | 2.568205  | 1.870909  | -5.103536 |
| H | 1.964654  | 0.669397  | -6.261124 |
| H | 3.186746  | 0.236076  | -5.048678 |
| C | -2.284380 | -0.823892 | -5.232811 |
| H | -2.568205 | -1.870909 | -5.103536 |
| H | -1.964654 | -0.669397 | -6.261124 |
| H | -3.186746 | -0.236076 | -5.048678 |
| C | 2.709911  | 1.018007  | -2.565128 |
| C | 3.737291  | 0.094634  | -2.315744 |
| C | 4.968323  | 0.572023  | -1.880872 |
| H | 5.769123  | -0.127961 | -1.674793 |
| C | 5.195314  | 1.928692  | -1.728793 |
| H | 6.164904  | 2.284491  | -1.398931 |
| C | 4.183090  | 2.830905  | -2.007858 |
| H | 4.372289  | 3.892336  | -1.898066 |
| C | 2.929728  | 2.397387  | -2.422626 |
| C | 3.507417  | -1.382450 | -2.545514 |
| H | 2.716971  | -1.470256 | -3.295588 |
| C | 4.735824  | -2.101164 | -3.088858 |
| H | 4.475400  | -3.125238 | -3.367014 |
| H | 5.532336  | -2.162900 | -2.343042 |
| H | 5.138984  | -1.599948 | -3.972029 |
| C | 1.820684  | 3.384504  | -2.710979 |
| H | 1.123452  | 2.897902  | -3.397499 |
| C | 2.309020  | 4.661807  | -3.381131 |
| H | 2.923601  | 5.265873  | -2.708891 |
| H | 1.456922  | 5.277308  | -3.679425 |
| H | 2.901763  | 4.445834  | -4.273100 |
| C | 1.046184  | 3.706298  | -1.437027 |
| H | 0.663066  | 2.798492  | -0.965761 |
| H | 0.196857  | 4.361351  | -1.648016 |
| H | 1.690692  | 4.203926  | -0.707682 |
| C | -2.709911 | -1.018007 | -2.565128 |
| C | -2.929728 | -2.397387 | -2.422626 |
| C | -4.183090 | -2.830905 | -2.007858 |
| H | -4.372289 | -3.892336 | -1.898066 |

|    |           |           |           |
|----|-----------|-----------|-----------|
| C  | -5.195314 | -1.928692 | -1.728793 |
| H  | -6.164904 | -2.284491 | -1.398931 |
| C  | -4.968323 | -0.572023 | -1.880872 |
| H  | -5.769123 | 0.127961  | -1.674793 |
| C  | -3.737291 | -0.094634 | -2.315744 |
| C  | -1.820684 | -3.384504 | -2.710979 |
| H  | -1.123452 | -2.897902 | -3.397499 |
| C  | -2.309020 | -4.661807 | -3.381131 |
| H  | -2.923601 | -5.265873 | -2.708891 |
| H  | -1.456922 | -5.277308 | -3.679425 |
| H  | -2.901763 | -4.445834 | -4.273100 |
| C  | -1.046184 | -3.706298 | -1.437027 |
| H  | -0.663066 | -2.798492 | -0.965761 |
| H  | -0.196857 | -4.361351 | -1.648016 |
| H  | -1.690692 | -4.203926 | -0.707682 |
| C  | -3.507417 | 1.382450  | -2.545514 |
| H  | -2.716971 | 1.470256  | -3.295588 |
| C  | -3.015132 | 2.066241  | -1.276101 |
| H  | -3.767665 | 2.010321  | -0.488624 |
| H  | -2.789342 | 3.119533  | -1.463577 |
| H  | -2.112064 | 1.594134  | -0.881798 |
| C  | -4.735824 | 2.101164  | -3.088858 |
| H  | -5.138984 | 1.599948  | -3.972029 |
| H  | -4.475400 | 3.125238  | -3.367014 |
| H  | -5.532336 | 2.162900  | -2.343042 |
| Cd | 0.000000  | 0.000000  | 1.337261  |
| N  | 1.435215  | -0.547166 | 2.968789  |
| N  | -1.435215 | 0.547166  | 2.968789  |
| C  | 1.195761  | -0.442067 | 4.263795  |
| C  | 2.709911  | -1.018007 | 2.565128  |
| C  | -1.195761 | 0.442067  | 4.263795  |
| C  | -2.709911 | 1.018007  | 2.565128  |
| C  | 0.000000  | 0.000000  | 4.841695  |
| C  | 2.284380  | -0.823892 | 5.232811  |
| C  | 3.737291  | -0.094634 | 2.315744  |
| C  | 2.929728  | -2.397387 | 2.422626  |
| C  | -2.284380 | 0.823892  | 5.232811  |
| C  | -2.929728 | 2.397387  | 2.422626  |
| C  | -3.737291 | 0.094634  | 2.315744  |
| H  | 0.000000  | 0.000000  | 5.922106  |
| H  | 2.568205  | -1.870909 | 5.103536  |

|   |           |           |          |
|---|-----------|-----------|----------|
| H | 1.964654  | -0.669397 | 6.261124 |
| H | 3.186746  | -0.236076 | 5.048678 |
| C | 4.968323  | -0.572023 | 1.880872 |
| C | 3.507417  | 1.382450  | 2.545514 |
| C | 4.183090  | -2.830905 | 2.007858 |
| C | 1.820684  | -3.384504 | 2.710979 |
| H | -2.568205 | 1.870909  | 5.103536 |
| H | -1.964654 | 0.669397  | 6.261124 |
| H | -3.186746 | 0.236076  | 5.048678 |
| C | -4.183090 | 2.830905  | 2.007858 |
| C | -1.820684 | 3.384504  | 2.710979 |
| C | -4.968323 | 0.572023  | 1.880872 |
| C | -3.507417 | -1.382450 | 2.545514 |
| H | 5.769123  | 0.127961  | 1.674793 |
| C | 5.195314  | -1.928692 | 1.728793 |
| C | 3.015132  | 2.066241  | 1.276101 |
| H | 2.716971  | 1.470256  | 3.295588 |
| C | 4.735824  | 2.101164  | 3.088858 |
| H | 4.372289  | -3.892336 | 1.898066 |
| H | 1.123452  | -2.897902 | 3.397499 |
| C | 2.309020  | -4.661807 | 3.381131 |
| C | 1.046184  | -3.706298 | 1.437027 |
| H | -4.372289 | 3.892336  | 1.898066 |
| C | -5.195314 | 1.928692  | 1.728793 |
| H | -1.123452 | 2.897902  | 3.397499 |
| C | -2.309020 | 4.661807  | 3.381131 |
| C | -1.046184 | 3.706298  | 1.437027 |
| H | -5.769123 | -0.127961 | 1.674793 |
| H | -2.716971 | -1.470256 | 3.295588 |
| C | -3.015132 | -2.066241 | 1.276101 |
| C | -4.735824 | -2.101164 | 3.088858 |
| H | 6.164904  | -2.284491 | 1.398931 |
| H | 3.767665  | 2.010321  | 0.488624 |
| H | 2.789342  | 3.119533  | 1.463577 |
| H | 2.112064  | 1.594134  | 0.881798 |
| H | 4.475400  | 3.125238  | 3.367014 |
| H | 5.532336  | 2.162900  | 2.343042 |
| H | 5.138984  | 1.599948  | 3.972029 |
| H | 2.923601  | -5.265873 | 2.708891 |
| H | 1.456922  | -5.277308 | 3.679425 |
| H | 2.901763  | -4.445834 | 4.273100 |

|   |           |           |          |
|---|-----------|-----------|----------|
| H | 0.663066  | -2.798492 | 0.965761 |
| H | 0.196857  | -4.361351 | 1.648016 |
| H | 1.690692  | -4.203926 | 0.707682 |
| H | -6.164904 | 2.284491  | 1.398931 |
| H | -2.923601 | 5.265873  | 2.708891 |
| H | -1.456922 | 5.277308  | 3.679425 |
| H | -2.901763 | 4.445834  | 4.273100 |
| H | -0.663066 | 2.798492  | 0.965761 |
| H | -0.196857 | 4.361351  | 1.648016 |
| H | -1.690692 | 4.203926  | 0.707682 |
| H | -3.767665 | -2.010321 | 0.488624 |
| H | -2.789342 | -3.119533 | 1.463577 |
| H | -2.112064 | -1.594134 | 0.881798 |
| H | -5.138984 | -1.599948 | 3.972029 |
| H | -4.475400 | -3.125238 | 3.367014 |
| H | -5.532336 | -2.162900 | 2.343042 |

**[(BDI)Cd]<sub>2</sub> (2) (D<sub>2d</sub>)**

|    |           |           |          |
|----|-----------|-----------|----------|
| Cd | 0.000000  | 0.000000  | 1.340306 |
| N  | 0.000000  | 1.489733  | 3.014428 |
| N  | 0.000000  | -1.489733 | 3.014428 |
| C  | 0.000000  | -1.265467 | 4.313595 |
| C  | 0.000000  | 1.265467  | 4.313595 |
| C  | 0.000000  | 0.000000  | 4.910118 |
| H  | 0.000000  | 0.000000  | 5.990716 |
| C  | -3.243973 | 2.070078  | 1.580303 |
| H  | -3.644217 | 2.768958  | 0.844643 |
| H  | -4.081267 | 1.489735  | 1.975939 |
| H  | -2.584473 | 1.382610  | 1.045541 |
| C  | 0.000000  | 2.445524  | 5.248112 |
| H  | 0.875054  | 3.075671  | 5.072317 |
| H  | 0.000000  | 2.123632  | 6.287569 |
| H  | -0.875054 | 3.075671  | 5.072317 |
| C  | 0.000000  | -2.445524 | 5.248112 |
| H  | -0.875054 | -3.075671 | 5.072317 |
| H  | 0.000000  | -2.123632 | 6.287569 |
| H  | 0.875054  | -3.075671 | 5.072317 |
| C  | 0.000000  | 2.815537  | 2.526569 |
| C  | -1.224115 | 3.447019  | 2.255021 |
| C  | -1.199072 | 4.676424  | 1.607925 |
| H  | -2.131662 | 5.178643  | 1.376172 |



|   |           |           |          |
|---|-----------|-----------|----------|
| C | 0.000000  | 5.277242  | 1.262055 |
| H | 0.000000  | 6.231473  | 0.747731 |
| C | 1.199072  | 4.676424  | 1.607925 |
| H | 2.131662  | 5.178643  | 1.376172 |
| C | 1.224115  | 3.447019  | 2.255021 |
| C | -2.523889 | 2.809395  | 2.702147 |
| H | -2.264529 | 2.062261  | 3.455055 |
| C | -3.461124 | 3.814911  | 3.361168 |
| H | -4.333969 | 3.302467  | 3.773456 |
| H | -3.827005 | 4.555727  | 2.645631 |
| H | -2.965750 | 4.352978  | 4.172768 |
| C | 2.523889  | 2.809395  | 2.702147 |
| H | 2.264529  | 2.062261  | 3.455055 |
| C | 3.461124  | 3.814911  | 3.361168 |
| H | 3.827005  | 4.555727  | 2.645631 |
| H | 4.333969  | 3.302467  | 3.773456 |
| H | 2.965750  | 4.352978  | 4.172768 |
| C | 3.243973  | 2.070078  | 1.580303 |
| H | 2.584473  | 1.382610  | 1.045541 |
| H | 4.081267  | 1.489735  | 1.975939 |
| H | 3.644217  | 2.768958  | 0.844643 |
| C | 0.000000  | -2.815537 | 2.526569 |
| C | -1.224115 | -3.447019 | 2.255021 |
| C | -1.199072 | -4.676424 | 1.607925 |
| H | -2.131662 | -5.178643 | 1.376172 |
| C | 0.000000  | -5.277242 | 1.262055 |
| H | 0.000000  | -6.231473 | 0.747731 |
| C | 1.199072  | -4.676424 | 1.607925 |
| H | 2.131662  | -5.178643 | 1.376172 |
| C | 1.224115  | -3.447019 | 2.255021 |
| C | -2.523889 | -2.809395 | 2.702147 |
| H | -2.264529 | -2.062261 | 3.455055 |
| C | -3.461124 | -3.814911 | 3.361168 |
| H | -3.827005 | -4.555727 | 2.645631 |
| H | -4.333969 | -3.302467 | 3.773456 |
| H | -2.965750 | -4.352978 | 4.172768 |
| C | -3.243973 | -2.070078 | 1.580303 |
| H | -2.584473 | -1.382610 | 1.045541 |
| H | -4.081267 | -1.489735 | 1.975939 |
| H | -3.644217 | -2.768958 | 0.844643 |
| C | 2.523889  | -2.809395 | 2.702147 |

|    |           |           |           |
|----|-----------|-----------|-----------|
| H  | 2.264529  | -2.062261 | 3.455055  |
| C  | 3.243973  | -2.070078 | 1.580303  |
| H  | 3.644217  | -2.768958 | 0.844643  |
| H  | 4.081267  | -1.489735 | 1.975939  |
| H  | 2.584473  | -1.382610 | 1.045541  |
| C  | 3.461124  | -3.814911 | 3.361168  |
| H  | 2.965750  | -4.352978 | 4.172768  |
| H  | 4.333969  | -3.302467 | 3.773456  |
| H  | 3.827005  | -4.555727 | 2.645631  |
| Cd | 0.000000  | 0.000000  | -1.340306 |
| N  | -1.489733 | 0.000000  | -3.014428 |
| N  | 1.489733  | 0.000000  | -3.014428 |
| C  | -1.265467 | 0.000000  | -4.313595 |
| C  | -2.815537 | 0.000000  | -2.526569 |
| C  | 1.265467  | 0.000000  | -4.313595 |
| C  | 2.815537  | 0.000000  | -2.526569 |
| C  | 0.000000  | 0.000000  | -4.910118 |
| C  | -2.445524 | 0.000000  | -5.248112 |
| C  | -3.447019 | 1.224115  | -2.255021 |
| C  | -3.447019 | -1.224115 | -2.255021 |
| C  | 2.445524  | 0.000000  | -5.248112 |
| C  | 3.447019  | 1.224115  | -2.255021 |
| C  | 3.447019  | -1.224115 | -2.255021 |
| H  | 0.000000  | 0.000000  | -5.990716 |
| H  | -3.075671 | -0.875054 | -5.072317 |
| H  | -2.123632 | 0.000000  | -6.287569 |
| H  | -3.075671 | 0.875054  | -5.072317 |
| C  | -4.676424 | 1.199072  | -1.607925 |
| C  | -2.809395 | 2.523889  | -2.702147 |
| C  | -4.676424 | -1.199072 | -1.607925 |
| C  | -2.809395 | -2.523889 | -2.702147 |
| H  | 3.075671  | 0.875054  | -5.072317 |
| H  | 2.123632  | 0.000000  | -6.287569 |
| H  | 3.075671  | -0.875054 | -5.072317 |
| C  | 4.676424  | 1.199072  | -1.607925 |
| C  | 2.809395  | 2.523889  | -2.702147 |
| C  | 4.676424  | -1.199072 | -1.607925 |
| C  | 2.809395  | -2.523889 | -2.702147 |
| H  | -5.178643 | 2.131662  | -1.376172 |
| C  | -5.277242 | 0.000000  | -1.262055 |
| C  | -2.070078 | 3.243973  | -1.580303 |

|   |           |           |           |
|---|-----------|-----------|-----------|
| H | -2.062261 | 2.264529  | -3.455055 |
| C | -3.814911 | 3.461124  | -3.361168 |
| H | -5.178643 | -2.131662 | -1.376172 |
| H | -2.062261 | -2.264529 | -3.455055 |
| C | -3.814911 | -3.461124 | -3.361168 |
| C | -2.070078 | -3.243973 | -1.580303 |
| H | 5.178643  | 2.131662  | -1.376172 |
| C | 5.277242  | 0.000000  | -1.262055 |
| H | 2.062261  | 2.264529  | -3.455055 |
| C | 3.814911  | 3.461124  | -3.361168 |
| C | 2.070078  | 3.243973  | -1.580303 |
| H | 5.178643  | -2.131662 | -1.376172 |
| H | 2.062261  | -2.264529 | -3.455055 |
| C | 2.070078  | -3.243973 | -1.580303 |
| C | 3.814911  | -3.461124 | -3.361168 |
| H | -6.231473 | 0.000000  | -0.747731 |
| H | -2.768958 | 3.644217  | -0.844643 |
| H | -1.489735 | 4.081267  | -1.975939 |
| H | -1.382610 | 2.584473  | -1.045541 |
| H | -3.302467 | 4.333969  | -3.773456 |
| H | -4.555727 | 3.827005  | -2.645631 |
| H | -4.352978 | 2.965750  | -4.172768 |
| H | -4.555727 | -3.827005 | -2.645631 |
| H | -3.302467 | -4.333969 | -3.773456 |
| H | -4.352978 | -2.965750 | -4.172768 |
| H | -1.382610 | -2.584473 | -1.045541 |
| H | -1.489735 | -4.081267 | -1.975939 |
| H | -2.768958 | -3.644217 | -0.844643 |
| H | 6.231473  | 0.000000  | -0.747731 |
| H | 4.555727  | 3.827005  | -2.645631 |
| H | 3.302467  | 4.333969  | -3.773456 |
| H | 4.352978  | 2.965750  | -4.172768 |
| H | 1.382610  | 2.584473  | -1.045541 |
| H | 1.489735  | 4.081267  | -1.975939 |
| H | 2.768958  | 3.644217  | -0.844643 |
| H | 2.768958  | -3.644217 | -0.844643 |
| H | 1.489735  | -4.081267 | -1.975939 |
| H | 1.382610  | -2.584473 | -1.045541 |
| H | 4.352978  | -2.965750 | -4.172768 |
| H | 3.302467  | -4.333969 | -3.773456 |
| H | 4.555727  | -3.827005 | -2.645631 |

[(BDI)Cd]<sub>2</sub> (2) (D<sub>2h</sub>)

|    |           |          |           |
|----|-----------|----------|-----------|
| Cd | 0.000000  | 1.385760 | 0.000000  |
| N  | -1.509940 | 3.094026 | 0.000000  |
| N  | 1.509940  | 3.094026 | 0.000000  |
| C  | 1.265872  | 4.392745 | 0.000000  |
| C  | -1.265872 | 4.392745 | 0.000000  |
| C  | 0.000000  | 4.982241 | 0.000000  |
| H  | 0.000000  | 6.062454 | 0.000000  |
| C  | -2.217917 | 1.731909 | 3.233724  |
| H  | -2.978999 | 1.026979 | 3.570945  |
| H  | -1.654316 | 2.067821 | 4.108332  |
| H  | -1.534880 | 1.188994 | 2.576559  |
| C  | -2.427892 | 5.352867 | 0.000000  |
| H  | -3.063172 | 5.194702 | -0.874055 |
| H  | -2.079498 | 6.383586 | 0.000000  |
| H  | -3.063172 | 5.194702 | 0.874055  |
| C  | 2.427892  | 5.352867 | 0.000000  |
| H  | 3.063172  | 5.194702 | 0.874055  |
| H  | 2.079498  | 6.383586 | 0.000000  |
| H  | 3.063172  | 5.194702 | -0.874055 |
| C  | -2.866572 | 2.687882 | 0.000000  |
| C  | -3.529022 | 2.495753 | 1.221572  |
| C  | -4.820982 | 1.985308 | 1.198062  |
| H  | -5.347273 | 1.815999 | 2.130667  |
| C  | -5.456127 | 1.709354 | 0.000000  |
| H  | -6.461963 | 1.306874 | 0.000000  |
| C  | -4.820982 | 1.985308 | -1.198062 |
| H  | -5.347273 | 1.815999 | -2.130667 |
| C  | -3.529022 | 2.495753 | -1.221572 |
| C  | -2.866671 | 2.907486 | 2.519451  |
| H  | -2.066711 | 3.604695 | 2.261820  |
| C  | -3.824078 | 3.635760 | 3.455618  |
| H  | -3.280691 | 4.026612 | 4.319527  |
| H  | -4.603710 | 2.970849 | 3.835809  |
| H  | -4.316299 | 4.472758 | 2.954951  |
| C  | -2.866671 | 2.907486 | -2.519451 |
| H  | -2.066711 | 3.604695 | -2.261820 |
| C  | -3.824078 | 3.635760 | -3.455618 |
| H  | -4.603710 | 2.970849 | -3.835809 |
| H  | -3.280691 | 4.026612 | -4.319527 |

|    |           |           |           |
|----|-----------|-----------|-----------|
| H  | -4.316299 | 4.472758  | -2.954951 |
| C  | -2.217917 | 1.731909  | -3.233724 |
| H  | -1.534880 | 1.188994  | -2.576559 |
| H  | -1.654316 | 2.067821  | -4.108332 |
| H  | -2.978999 | 1.026979  | -3.570945 |
| C  | 2.866572  | 2.687882  | 0.000000  |
| C  | 3.529022  | 2.495753  | 1.221572  |
| C  | 4.820982  | 1.985308  | 1.198062  |
| H  | 5.347273  | 1.815999  | 2.130667  |
| C  | 5.456127  | 1.709354  | 0.000000  |
| H  | 6.461963  | 1.306874  | 0.000000  |
| C  | 4.820982  | 1.985308  | -1.198062 |
| H  | 5.347273  | 1.815999  | -2.130667 |
| C  | 3.529022  | 2.495753  | -1.221572 |
| C  | 2.866671  | 2.907486  | 2.519451  |
| H  | 2.066711  | 3.604695  | 2.261820  |
| C  | 3.824078  | 3.635760  | 3.455618  |
| H  | 4.603710  | 2.970849  | 3.835809  |
| H  | 3.280691  | 4.026612  | 4.319527  |
| H  | 4.316299  | 4.472758  | 2.954951  |
| C  | 2.217917  | 1.731909  | 3.233724  |
| H  | 1.534880  | 1.188994  | 2.576559  |
| H  | 1.654316  | 2.067821  | 4.108332  |
| H  | 2.978999  | 1.026979  | 3.570945  |
| C  | 2.866671  | 2.907486  | -2.519451 |
| H  | 2.066711  | 3.604695  | -2.261820 |
| C  | 2.217917  | 1.731909  | -3.233724 |
| H  | 2.978999  | 1.026979  | -3.570945 |
| H  | 1.654316  | 2.067821  | -4.108332 |
| H  | 1.534880  | 1.188994  | -2.576559 |
| C  | 3.824078  | 3.635760  | -3.455618 |
| H  | 4.316299  | 4.472758  | -2.954951 |
| H  | 3.280691  | 4.026612  | -4.319527 |
| H  | 4.603710  | 2.970849  | -3.835809 |
| Cd | 0.000000  | -1.385760 | 0.000000  |
| N  | 1.509940  | -3.094026 | 0.000000  |
| N  | -1.509940 | -3.094026 | 0.000000  |
| C  | 1.265872  | -4.392745 | 0.000000  |
| C  | 2.866572  | -2.687882 | 0.000000  |
| C  | -1.265872 | -4.392745 | 0.000000  |
| C  | -2.866572 | -2.687882 | 0.000000  |

|   |           |           |           |
|---|-----------|-----------|-----------|
| C | 0.000000  | -4.982241 | 0.000000  |
| C | 2.427892  | -5.352867 | 0.000000  |
| C | 3.529022  | -2.495753 | 1.221572  |
| C | 3.529022  | -2.495753 | -1.221572 |
| C | -2.427892 | -5.352867 | 0.000000  |
| C | -3.529022 | -2.495753 | 1.221572  |
| C | -3.529022 | -2.495753 | -1.221572 |
| H | 0.000000  | -6.062454 | 0.000000  |
| H | 3.063172  | -5.194702 | -0.874055 |
| H | 2.079498  | -6.383586 | 0.000000  |
| H | 3.063172  | -5.194702 | 0.874055  |
| C | 4.820982  | -1.985308 | 1.198062  |
| C | 2.866671  | -2.907486 | 2.519451  |
| C | 4.820982  | -1.985308 | -1.198062 |
| C | 2.866671  | -2.907486 | -2.519451 |
| H | -3.063172 | -5.194702 | 0.874055  |
| H | -2.079498 | -6.383586 | 0.000000  |
| H | -3.063172 | -5.194702 | -0.874055 |
| C | -4.820982 | -1.985308 | 1.198062  |
| C | -2.866671 | -2.907486 | 2.519451  |
| C | -4.820982 | -1.985308 | -1.198062 |
| C | -2.866671 | -2.907486 | -2.519451 |
| H | 5.347273  | -1.815999 | 2.130667  |
| C | 5.456127  | -1.709354 | 0.000000  |
| C | 2.217917  | -1.731909 | 3.233724  |
| H | 2.066711  | -3.604695 | 2.261820  |
| C | 3.824078  | -3.635760 | 3.455618  |
| H | 5.347273  | -1.815999 | -2.130667 |
| H | 2.066711  | -3.604695 | -2.261820 |
| C | 3.824078  | -3.635760 | -3.455618 |
| C | 2.217917  | -1.731909 | -3.233724 |
| H | -5.347273 | -1.815999 | 2.130667  |
| C | -5.456127 | -1.709354 | 0.000000  |
| H | -2.066711 | -3.604695 | 2.261820  |
| C | -3.824078 | -3.635760 | 3.455618  |
| C | -2.217917 | -1.731909 | 3.233724  |
| H | -5.347273 | -1.815999 | -2.130667 |
| H | -2.066711 | -3.604695 | -2.261820 |
| C | -2.217917 | -1.731909 | -3.233724 |
| C | -3.824078 | -3.635760 | -3.455618 |
| H | 6.461963  | -1.306874 | 0.000000  |

|   |           |           |           |
|---|-----------|-----------|-----------|
| H | 2.978999  | -1.026979 | 3.570945  |
| H | 1.654316  | -2.067821 | 4.108332  |
| H | 1.534880  | -1.188994 | 2.576559  |
| H | 3.280691  | -4.026612 | 4.319527  |
| H | 4.603710  | -2.970849 | 3.835809  |
| H | 4.316299  | -4.472758 | 2.954951  |
| H | 4.603710  | -2.970849 | -3.835809 |
| H | 3.280691  | -4.026612 | -4.319527 |
| H | 4.316299  | -4.472758 | -2.954951 |
| H | 1.534880  | -1.188994 | -2.576559 |
| H | 1.654316  | -2.067821 | -4.108332 |
| H | 2.978999  | -1.026979 | -3.570945 |
| H | -6.461963 | -1.306874 | 0.000000  |
| H | -4.603710 | -2.970849 | 3.835809  |
| H | -3.280691 | -4.026612 | 4.319527  |
| H | -4.316299 | -4.472758 | 2.954951  |
| H | -1.534880 | -1.188994 | 2.576559  |
| H | -1.654316 | -2.067821 | 4.108332  |
| H | -2.978999 | -1.026979 | 3.570945  |
| H | -2.978999 | -1.026979 | -3.570945 |
| H | -1.654316 | -2.067821 | -4.108332 |
| H | -1.534880 | -1.188994 | -2.576559 |
| H | -4.316299 | -4.472758 | -2.954951 |
| H | -3.280691 | -4.026612 | -4.319527 |
| H | -4.603710 | -2.970849 | -3.835809 |

[(BDI)Zn]<sub>2</sub> (D<sub>2d</sub>)

|    |           |           |          |
|----|-----------|-----------|----------|
| Zn | 0.000000  | 0.000000  | 1.262588 |
| N  | 1.450112  | 0.000000  | 2.717770 |
| N  | -1.450112 | 0.000000  | 2.717770 |
| C  | -1.253608 | 0.000000  | 4.026863 |
| C  | 1.253608  | 0.000000  | 4.026863 |
| C  | 0.000000  | 0.000000  | 4.637004 |
| H  | 0.000000  | 0.000000  | 5.717105 |
| C  | 1.928199  | 3.179867  | 1.470066 |
| H  | 2.538250  | 3.638405  | 0.692695 |
| H  | 1.317571  | 3.968602  | 1.915721 |
| H  | 1.256551  | 2.473100  | 0.978544 |
| C  | 2.439744  | 0.000000  | 4.954566 |
| H  | 3.071565  | -0.873880 | 4.782728 |
| H  | 2.115096  | 0.000000  | 5.993157 |

|   |           |           |          |
|---|-----------|-----------|----------|
| H | 3.071565  | 0.873880  | 4.782728 |
| C | -2.439744 | 0.000000  | 4.954566 |
| H | -3.071565 | 0.873880  | 4.782728 |
| H | -2.115096 | 0.000000  | 5.993157 |
| H | -3.071565 | -0.873880 | 4.782728 |
| C | 2.794381  | 0.000000  | 2.269076 |
| C | 3.449683  | 1.224915  | 2.071110 |
| C | 4.732858  | 1.199152  | 1.538038 |
| H | 5.262728  | 2.129172  | 1.368691 |
| C | 5.358313  | 0.000000  | 1.241183 |
| H | 6.356341  | 0.000000  | 0.817896 |
| C | 4.732858  | -1.199152 | 1.538038 |
| H | 5.262728  | -2.129172 | 1.368691 |
| C | 3.449683  | -1.224915 | 2.071110 |
| C | 2.796226  | 2.514626  | 2.530225 |
| H | 2.125622  | 2.244508  | 3.349173 |
| C | 3.802009  | 3.514812  | 3.085941 |
| H | 3.276405  | 4.362824  | 3.531636 |
| H | 4.451433  | 3.914494  | 2.302674 |
| H | 4.438675  | 3.065864  | 3.852071 |
| C | 2.796226  | -2.514626 | 2.530225 |
| H | 2.125622  | -2.244508 | 3.349173 |
| C | 3.802009  | -3.514812 | 3.085941 |
| H | 4.451433  | -3.914494 | 2.302674 |
| H | 3.276405  | -4.362824 | 3.531636 |
| H | 4.438675  | -3.065864 | 3.852071 |
| C | 1.928199  | -3.179867 | 1.470066 |
| H | 1.256551  | -2.473100 | 0.978544 |
| H | 1.317571  | -3.968602 | 1.915721 |
| H | 2.538250  | -3.638405 | 0.692695 |
| C | -2.794381 | 0.000000  | 2.269076 |
| C | -3.449683 | 1.224915  | 2.071110 |
| C | -4.732858 | 1.199152  | 1.538038 |
| H | -5.262728 | 2.129172  | 1.368691 |
| C | -5.358313 | 0.000000  | 1.241183 |
| H | -6.356341 | 0.000000  | 0.817896 |
| C | -4.732858 | -1.199152 | 1.538038 |
| H | -5.262728 | -2.129172 | 1.368691 |
| C | -3.449683 | -1.224915 | 2.071110 |
| C | -2.796226 | 2.514626  | 2.530225 |
| H | -2.125622 | 2.244508  | 3.349173 |



|    |           |           |           |
|----|-----------|-----------|-----------|
| C  | -3.802009 | 3.514812  | 3.085941  |
| H  | -4.451433 | 3.914494  | 2.302674  |
| H  | -3.276405 | 4.362824  | 3.531636  |
| H  | -4.438675 | 3.065864  | 3.852071  |
| C  | -1.928199 | 3.179867  | 1.470066  |
| H  | -1.256551 | 2.473100  | 0.978544  |
| H  | -1.317571 | 3.968602  | 1.915721  |
| H  | -2.538250 | 3.638405  | 0.692695  |
| C  | -2.796226 | -2.514626 | 2.530225  |
| H  | -2.125622 | -2.244508 | 3.349173  |
| C  | -1.928199 | -3.179867 | 1.470066  |
| H  | -2.538250 | -3.638405 | 0.692695  |
| H  | -1.317571 | -3.968602 | 1.915721  |
| H  | -1.256551 | -2.473100 | 0.978544  |
| C  | -3.802009 | -3.514812 | 3.085941  |
| H  | -4.438675 | -3.065864 | 3.852071  |
| H  | -3.276405 | -4.362824 | 3.531636  |
| H  | -4.451433 | -3.914494 | 2.302674  |
| Zn | 0.000000  | 0.000000  | -1.262588 |
| N  | 0.000000  | 1.450112  | -2.717770 |
| N  | 0.000000  | -1.450112 | -2.717770 |
| C  | 0.000000  | 1.253608  | -4.026863 |
| C  | 0.000000  | 2.794381  | -2.269076 |
| C  | 0.000000  | -1.253608 | -4.026863 |
| C  | 0.000000  | -2.794381 | -2.269076 |
| C  | 0.000000  | 0.000000  | -4.637004 |
| C  | 0.000000  | 2.439744  | -4.954566 |
| C  | 1.224915  | 3.449683  | -2.071110 |
| C  | -1.224915 | 3.449683  | -2.071110 |
| C  | 0.000000  | -2.439744 | -4.954566 |
| C  | 1.224915  | -3.449683 | -2.071110 |
| C  | -1.224915 | -3.449683 | -2.071110 |
| H  | 0.000000  | 0.000000  | -5.717105 |
| H  | -0.873880 | 3.071565  | -4.782728 |
| H  | 0.000000  | 2.115096  | -5.993157 |
| H  | 0.873880  | 3.071565  | -4.782728 |
| C  | 1.199152  | 4.732858  | -1.538038 |
| C  | 2.514626  | 2.796226  | -2.530225 |
| C  | -1.199152 | 4.732858  | -1.538038 |
| C  | -2.514626 | 2.796226  | -2.530225 |
| H  | 0.873880  | -3.071565 | -4.782728 |

|   |           |           |           |
|---|-----------|-----------|-----------|
| H | 0.000000  | -2.115096 | -5.993157 |
| H | -0.873880 | -3.071565 | -4.782728 |
| C | 1.199152  | -4.732858 | -1.538038 |
| C | 2.514626  | -2.796226 | -2.530225 |
| C | -1.199152 | -4.732858 | -1.538038 |
| C | -2.514626 | -2.796226 | -2.530225 |
| H | 2.129172  | 5.262728  | -1.368691 |
| C | 0.000000  | 5.358313  | -1.241183 |
| C | 3.179867  | 1.928199  | -1.470066 |
| H | 2.244508  | 2.125622  | -3.349173 |
| C | 3.514812  | 3.802009  | -3.085941 |
| H | -2.129172 | 5.262728  | -1.368691 |
| H | -2.244508 | 2.125622  | -3.349173 |
| C | -3.514812 | 3.802009  | -3.085941 |
| C | -3.179867 | 1.928199  | -1.470066 |
| H | 2.129172  | -5.262728 | -1.368691 |
| C | 0.000000  | -5.358313 | -1.241183 |
| H | 2.244508  | -2.125622 | -3.349173 |
| C | 3.514812  | -3.802009 | -3.085941 |
| C | 3.179867  | -1.928199 | -1.470066 |
| H | -2.129172 | -5.262728 | -1.368691 |
| H | -2.244508 | -2.125622 | -3.349173 |
| C | -3.179867 | -1.928199 | -1.470066 |
| C | -3.514812 | -3.802009 | -3.085941 |
| H | 0.000000  | 6.356341  | -0.817896 |
| H | 3.638405  | 2.538250  | -0.692695 |
| H | 3.968602  | 1.317571  | -1.915721 |
| H | 2.473100  | 1.256551  | -0.978544 |
| H | 4.362824  | 3.276405  | -3.531636 |
| H | 3.914494  | 4.451433  | -2.302674 |
| H | 3.065864  | 4.438675  | -3.852071 |
| H | -3.914494 | 4.451433  | -2.302674 |
| H | -4.362824 | 3.276405  | -3.531636 |
| H | -3.065864 | 4.438675  | -3.852071 |
| H | -2.473100 | 1.256551  | -0.978544 |
| H | -3.968602 | 1.317571  | -1.915721 |
| H | -3.638405 | 2.538250  | -0.692695 |
| H | 0.000000  | -6.356341 | -0.817896 |
| H | 3.914494  | -4.451433 | -2.302674 |
| H | 4.362824  | -3.276405 | -3.531636 |
| H | 3.065864  | -4.438675 | -3.852071 |

|   |           |           |           |
|---|-----------|-----------|-----------|
| H | 2.473100  | -1.256551 | -0.978544 |
| H | 3.968602  | -1.317571 | -1.915721 |
| H | 3.638405  | -2.538250 | -0.692695 |
| H | -3.638405 | -2.538250 | -0.692695 |
| H | -3.968602 | -1.317571 | -1.915721 |
| H | -2.473100 | -1.256551 | -0.978544 |
| H | -3.065864 | -4.438675 | -3.852071 |
| H | -4.362824 | -3.276405 | -3.531636 |
| H | -3.914494 | -4.451433 | -2.302674 |

**[(BDI)Zn]<sub>2</sub> (D<sub>2h</sub>)**

|    |           |          |           |
|----|-----------|----------|-----------|
| Zn | 0.000000  | 1.332887 | 0.000000  |
| N  | -1.460136 | 2.834006 | 0.000000  |
| N  | 1.460136  | 2.834006 | 0.000000  |
| C  | 1.252185  | 4.143985 | 0.000000  |
| C  | -1.252185 | 4.143985 | 0.000000  |
| C  | 0.000000  | 4.750874 | 0.000000  |
| H  | 0.000000  | 5.830563 | 0.000000  |
| C  | -2.036547 | 1.697089 | 3.207782  |
| H  | -2.708378 | 0.956589 | 3.639550  |
| H  | -1.437973 | 2.122453 | 4.017628  |
| H  | -1.363374 | 1.179368 | 2.521936  |
| C  | -2.424551 | 5.093410 | 0.000000  |
| H  | -3.061020 | 4.938432 | -0.872782 |
| H  | -2.076452 | 6.124294 | 0.000000  |
| H  | -3.061020 | 4.938432 | 0.872782  |
| C  | 2.424551  | 5.093410 | 0.000000  |
| H  | 3.061020  | 4.938432 | 0.872782  |
| H  | 2.076452  | 6.124294 | 0.000000  |
| H  | 3.061020  | 4.938432 | -0.872782 |
| C  | -2.825591 | 2.445478 | 0.000000  |
| C  | -3.499149 | 2.312315 | 1.223292  |
| C  | -4.818648 | 1.877594 | 1.198885  |
| H  | -5.362045 | 1.756896 | 2.128586  |
| C  | -5.464782 | 1.633571 | 0.000000  |
| H  | -6.493367 | 1.293353 | 0.000000  |
| C  | -4.818648 | 1.877594 | -1.198885 |
| H  | -5.362045 | 1.756896 | -2.128586 |
| C  | -3.499149 | 2.312315 | -1.223292 |
| C  | -2.836141 | 2.780264 | 2.504639  |
| H  | -2.120285 | 3.553849 | 2.218947  |

|   |           |          |           |
|---|-----------|----------|-----------|
| C | -3.821519 | 3.418415 | 3.475661  |
| H | -3.281316 | 3.870344 | 4.311173  |
| H | -4.510506 | 2.681998 | 3.897311  |
| H | -4.418098 | 4.196471 | 2.993527  |
| C | -2.836141 | 2.780264 | -2.504639 |
| H | -2.120285 | 3.553849 | -2.218947 |
| C | -3.821519 | 3.418415 | -3.475661 |
| H | -4.510506 | 2.681998 | -3.897311 |
| H | -3.281316 | 3.870344 | -4.311173 |
| H | -4.418098 | 4.196471 | -2.993527 |
| C | -2.036547 | 1.697089 | -3.207782 |
| H | -1.363374 | 1.179368 | -2.521936 |
| H | -1.437973 | 2.122453 | -4.017628 |
| H | -2.708378 | 0.956589 | -3.639550 |
| C | 2.825591  | 2.445478 | 0.000000  |
| C | 3.499149  | 2.312315 | 1.223292  |
| C | 4.818648  | 1.877594 | 1.198885  |
| H | 5.362045  | 1.756896 | 2.128586  |
| C | 5.464782  | 1.633571 | 0.000000  |
| H | 6.493367  | 1.293353 | 0.000000  |
| C | 4.818648  | 1.877594 | -1.198885 |
| H | 5.362045  | 1.756896 | -2.128586 |
| C | 3.499149  | 2.312315 | -1.223292 |
| C | 2.836141  | 2.780264 | 2.504639  |
| H | 2.120285  | 3.553849 | 2.218947  |
| C | 3.821519  | 3.418415 | 3.475661  |
| H | 4.510506  | 2.681998 | 3.897311  |
| H | 3.281316  | 3.870344 | 4.311173  |
| H | 4.418098  | 4.196471 | 2.993527  |
| C | 2.036547  | 1.697089 | 3.207782  |
| H | 1.363374  | 1.179368 | 2.521936  |
| H | 1.437973  | 2.122453 | 4.017628  |
| H | 2.708378  | 0.956589 | 3.639550  |
| C | 2.836141  | 2.780264 | -2.504639 |
| H | 2.120285  | 3.553849 | -2.218947 |
| C | 2.036547  | 1.697089 | -3.207782 |
| H | 2.708378  | 0.956589 | -3.639550 |
| H | 1.437973  | 2.122453 | -4.017628 |
| H | 1.363374  | 1.179368 | -2.521936 |
| C | 3.821519  | 3.418415 | -3.475661 |
| H | 4.418098  | 4.196471 | -2.993527 |

|    |           |           |           |
|----|-----------|-----------|-----------|
| H  | 3.281316  | 3.870344  | -4.311173 |
| H  | 4.510506  | 2.681998  | -3.897311 |
| Zn | 0.000000  | -1.332887 | 0.000000  |
| N  | 1.460136  | -2.834006 | 0.000000  |
| N  | -1.460136 | -2.834006 | 0.000000  |
| C  | 1.252185  | -4.143985 | 0.000000  |
| C  | 2.825591  | -2.445478 | 0.000000  |
| C  | -1.252185 | -4.143985 | 0.000000  |
| C  | -2.825591 | -2.445478 | 0.000000  |
| C  | 0.000000  | -4.750874 | 0.000000  |
| C  | 2.424551  | -5.093410 | 0.000000  |
| C  | 3.499149  | -2.312315 | 1.223292  |
| C  | 3.499149  | -2.312315 | -1.223292 |
| C  | -2.424551 | -5.093410 | 0.000000  |
| C  | -3.499149 | -2.312315 | 1.223292  |
| C  | -3.499149 | -2.312315 | -1.223292 |
| H  | 0.000000  | -5.830563 | 0.000000  |
| H  | 3.061020  | -4.938432 | -0.872782 |
| H  | 2.076452  | -6.124294 | 0.000000  |
| H  | 3.061020  | -4.938432 | 0.872782  |
| C  | 4.818648  | -1.877594 | 1.198885  |
| C  | 2.836141  | -2.780264 | 2.504639  |
| C  | 4.818648  | -1.877594 | -1.198885 |
| C  | 2.836141  | -2.780264 | -2.504639 |
| H  | -3.061020 | -4.938432 | 0.872782  |
| H  | -2.076452 | -6.124294 | 0.000000  |
| H  | -3.061020 | -4.938432 | -0.872782 |
| C  | -4.818648 | -1.877594 | 1.198885  |
| C  | -2.836141 | -2.780264 | 2.504639  |
| C  | -4.818648 | -1.877594 | -1.198885 |
| C  | -2.836141 | -2.780264 | -2.504639 |
| H  | 5.362045  | -1.756896 | 2.128586  |
| C  | 5.464782  | -1.633571 | 0.000000  |
| C  | 2.036547  | -1.697089 | 3.207782  |
| H  | 2.120285  | -3.553849 | 2.218947  |
| C  | 3.821519  | -3.418415 | 3.475661  |
| H  | 5.362045  | -1.756896 | -2.128586 |
| H  | 2.120285  | -3.553849 | -2.218947 |
| C  | 3.821519  | -3.418415 | -3.475661 |
| C  | 2.036547  | -1.697089 | -3.207782 |
| H  | -5.362045 | -1.756896 | 2.128586  |

|                      |           |           |           |
|----------------------|-----------|-----------|-----------|
| C                    | -5.464782 | -1.633571 | 0.000000  |
| H                    | -2.120285 | -3.553849 | 2.218947  |
| C                    | -3.821519 | -3.418415 | 3.475661  |
| C                    | -2.036547 | -1.697089 | 3.207782  |
| H                    | -5.362045 | -1.756896 | -2.128586 |
| H                    | -2.120285 | -3.553849 | -2.218947 |
| C                    | -2.036547 | -1.697089 | -3.207782 |
| C                    | -3.821519 | -3.418415 | -3.475661 |
| H                    | 6.493367  | -1.293353 | 0.000000  |
| H                    | 2.708378  | -0.956589 | 3.639550  |
| H                    | 1.437973  | -2.122453 | 4.017628  |
| H                    | 1.363374  | -1.179368 | 2.521936  |
| H                    | 3.281316  | -3.870344 | 4.311173  |
| H                    | 4.510506  | -2.681998 | 3.897311  |
| H                    | 4.418098  | -4.196471 | 2.993527  |
| H                    | 4.510506  | -2.681998 | -3.897311 |
| H                    | 3.281316  | -3.870344 | -4.311173 |
| H                    | 4.418098  | -4.196471 | -2.993527 |
| H                    | 1.363374  | -1.179368 | -2.521936 |
| H                    | 1.437973  | -2.122453 | -4.017628 |
| H                    | 2.708378  | -0.956589 | -3.639550 |
| H                    | -6.493367 | -1.293353 | 0.000000  |
| H                    | -4.510506 | -2.681998 | 3.897311  |
| H                    | -3.281316 | -3.870344 | 4.311173  |
| H                    | -4.418098 | -4.196471 | 2.993527  |
| H                    | -1.363374 | -1.179368 | 2.521936  |
| H                    | -1.437973 | -2.122453 | 4.017628  |
| H                    | -2.708378 | -0.956589 | 3.639550  |
| H                    | -2.708378 | -0.956589 | -3.639550 |
| H                    | -1.437973 | -2.122453 | -4.017628 |
| H                    | -1.363374 | -1.179368 | -2.521936 |
| H                    | -4.418098 | -4.196471 | -2.993527 |
| H                    | -3.281316 | -3.870344 | -4.311173 |
| H                    | -4.510506 | -2.681998 | -3.897311 |
| <b>H<sub>2</sub></b> |           |           |           |
| H                    | 0.000000  | 0.000000  | 0.126898  |
| H                    | 0.000000  | 0.000000  | 0.873102  |
